# Supplementary material for: Targeting MCL-1/BCL-XL Forestalls the Acquisition of Resistance to ABT-199 in Acute Myeloid Leukemia
Source: PubMed Central journal article supplement (PMC4901329; doi:10.1038/srep27696), 2016-06-10
Supplement: srep27696-s1.pdf [file srep27696-s1.pdf]

# Targeting MCL-1/BCL-X<sub>L</sub> Forestalls the Acquisition of Resistance to ABT-199 in Acute Myeloid Leukemia

**Authors:** Kevin H. Lin<sup>1</sup>, Peter S. Winter<sup>1,2</sup>, Abigail Xie<sup>1</sup>, Cullen Roth<sup>1,2</sup>, Colin A. Martz<sup>1</sup>, Elizabeth M. Stein<sup>1</sup>, Gray R. Anderson<sup>1</sup>, Jennifer P. Tingley<sup>1</sup>, and Kris C. Wood<sup>1\*</sup>

**Affiliations:**

<sup>1</sup>Department of Pharmacology and Cancer Biology, Duke University, Durham, NC 27710, USA;

<sup>2</sup>Program in Genetics and Genomics, Duke University, Durham, NC 27710, USA

**Figure S1**

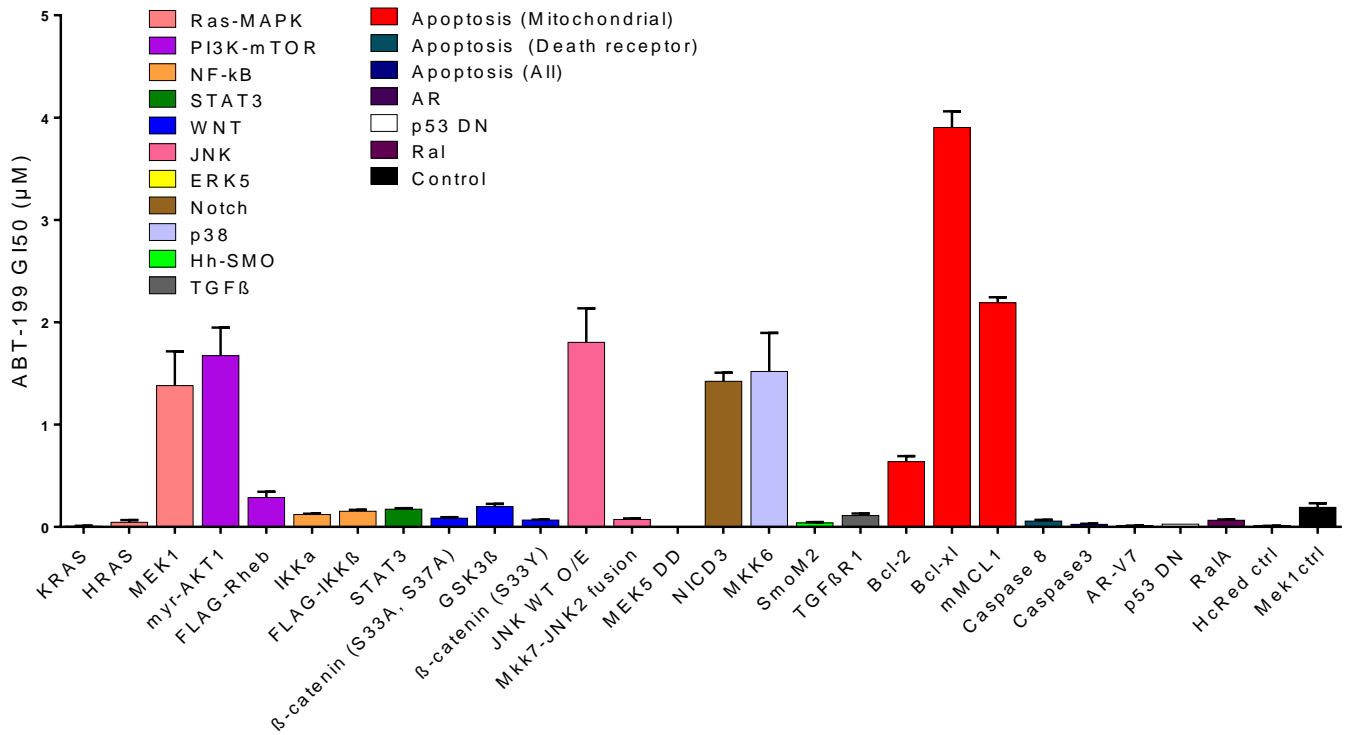

**Supplementary Figure 1. Pathway activating screen in OCI-AML2 nominates BCL-X<sub>L</sub> and MCL-1.** Discrete populations of OCI-AML2 cells were individually transduced with indicated pathway-activating cDNA constructs. Drug sensitivity of each population was evaluated with a GI<sub>50</sub> assay; data shown are mean GI<sub>50</sub> (µM) ± SEM. Immunoblots showing overexpression of BCL-X<sub>L</sub> and MCL-1 are shown in Figure 1.

**Figure S2**

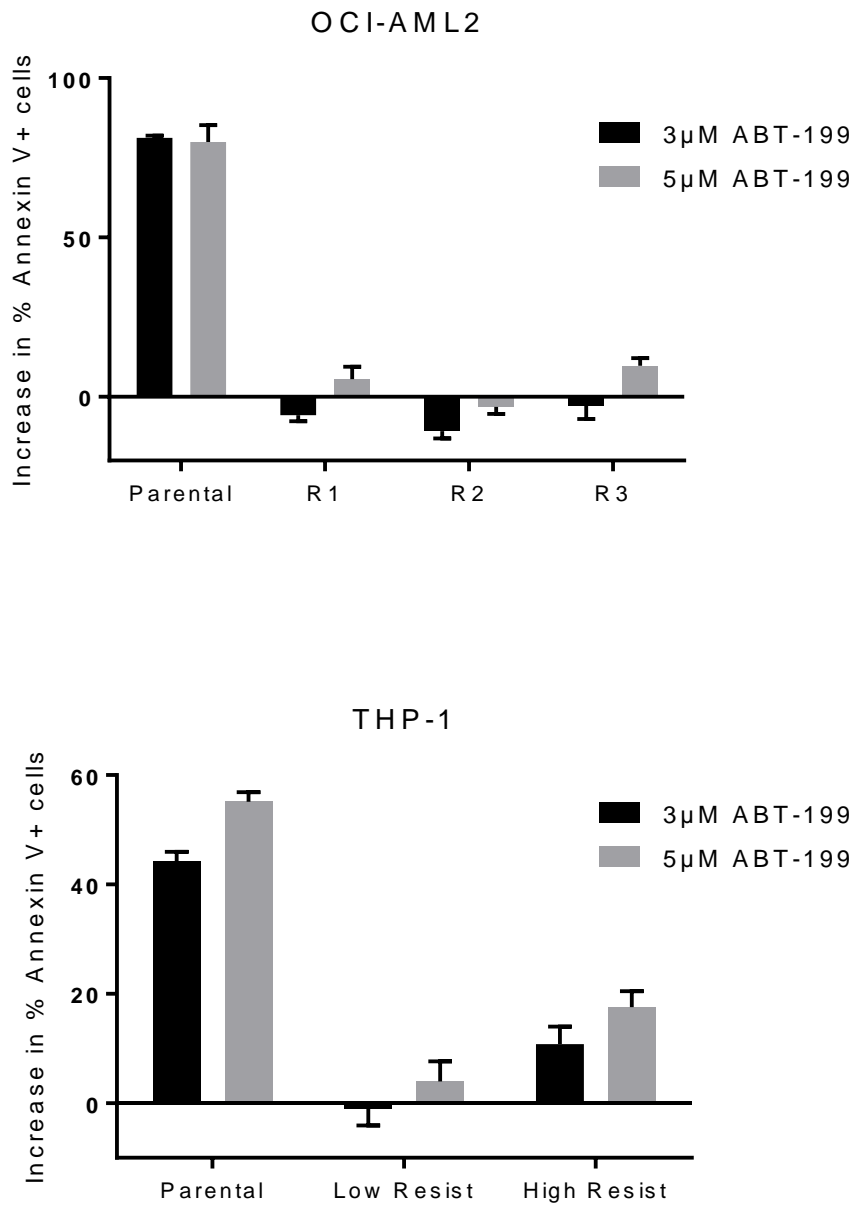

**Supplementary Figure 2. Comparing drug-induced apoptosis in ABT-199-resistant versus parental AML cells.** Increase in annexin V-positive OCI-AML2 or THP-1 cells after 48 hours treatment with 3 μM or 5 μM ABT-199. Data shown are mean increases in annexin V-positive cells relative to matched cells treated with DMSO ± SD from three independent experiments.

Figure S3

A

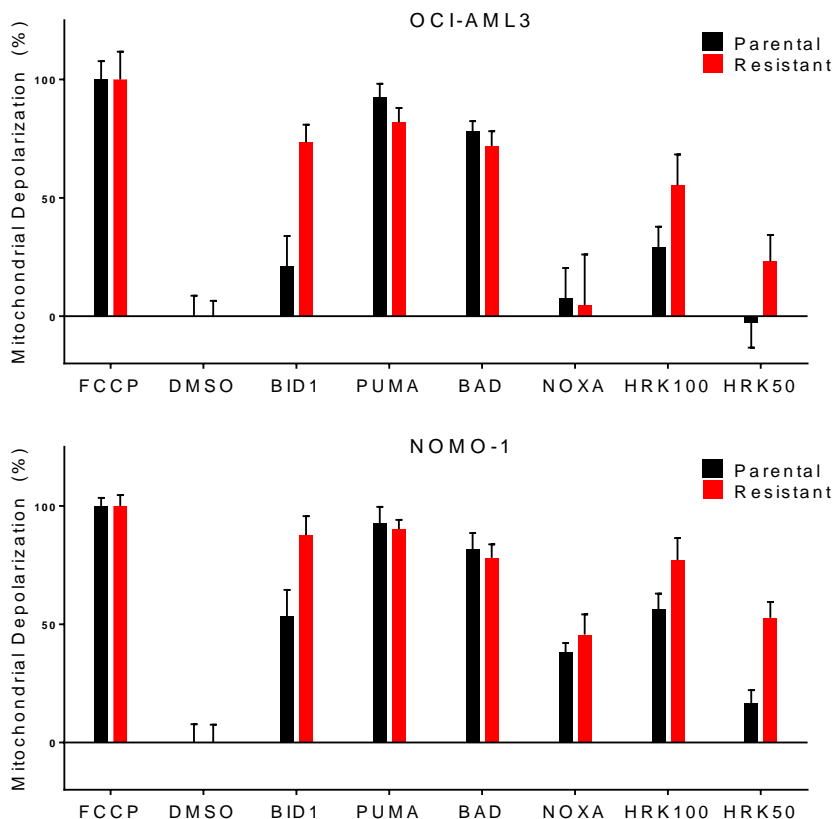

B

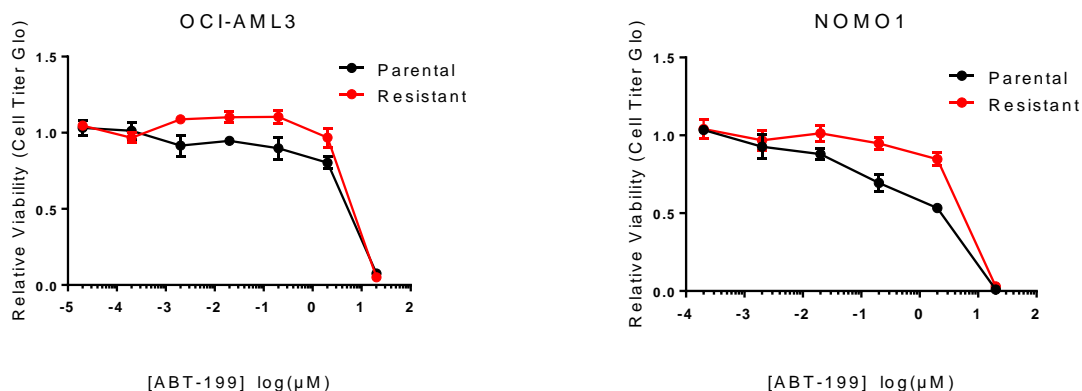

**Supplementary Figure 3. Characterization of parental and resistant OCI-AML3 and NOMO-1. (A)** BH3 profiling, as in Figure 2, of parental and resistant OCI-AML3 and NOMO-1 cells reveals increased mitochondrial depolarization in resistant lines in response to NOXA and HRK peptides. Viability data is expressed as a percentage of DMSO-treated cells. SEM is of three independent experiments and indicated by error bars. **(B)** ABT-199 dose-response curves for parental and resistant derivatives of OCI-AML3 and NOMO-1. Viability data is expressed as a percentage of DMSO-treated cells. SEM is of three independent experiments and indicated by error bars.

Figure S4

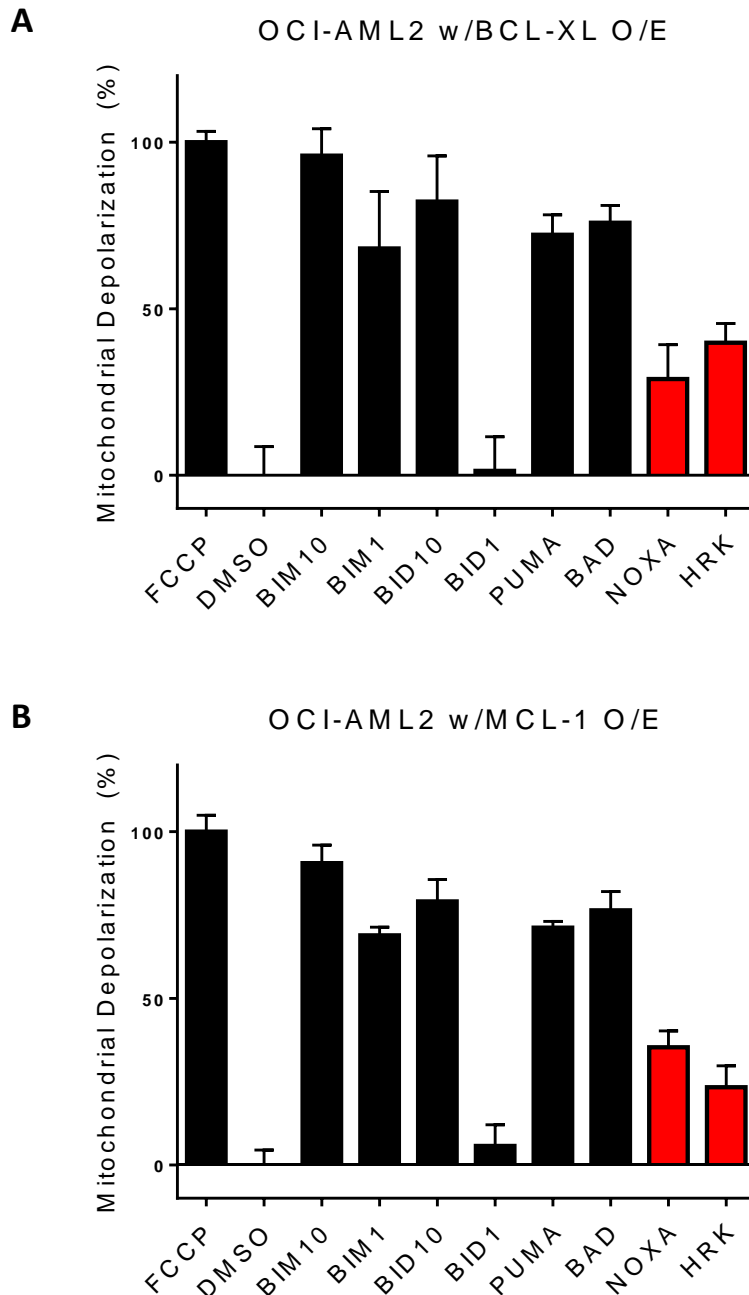

**Supplementary Figure 4. BH3 profiling of OCI-AML2 cells overexpressing BCL-X<sub>L</sub> or mMCL-1.** BH3 profiling, as in Figure 2, was performed in parental OCI-AML2 cells transduced with indicated lentiviral construct. Artificial overexpression of **(A)** BCL-X<sub>L</sub> and **(B)** MCL-1 in parental OCI-AML2 cells results in preferentially increased mitochondrial depolarization upon treatment with HRK and NOXA, respectively. Unless otherwise indicated, peptide concentration used was 100  $\mu$ M. Data shown represent the mean  $\pm$  SD of three independent experiments per peptide.

**Figure S5**

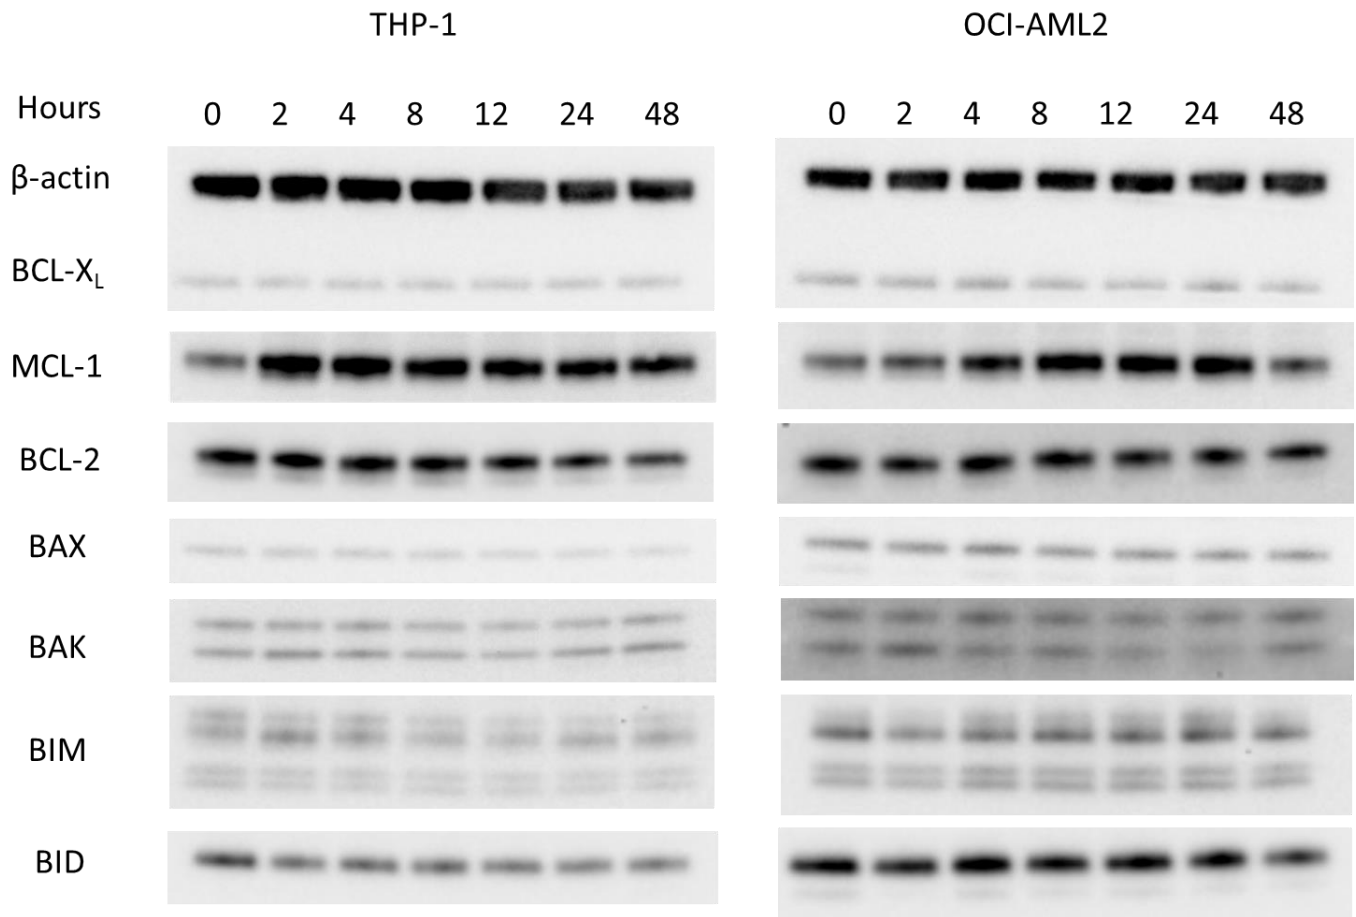

**Supplementary Figure 5. Western blot analysis of BCL-2 family proteins.** Western blot analysis of parental THP-1 and OCI-AML2 harvested at the indicated time points following treatment with 1 μM ABT-199. Blots are representative of two replicate experiments.

Figure S6

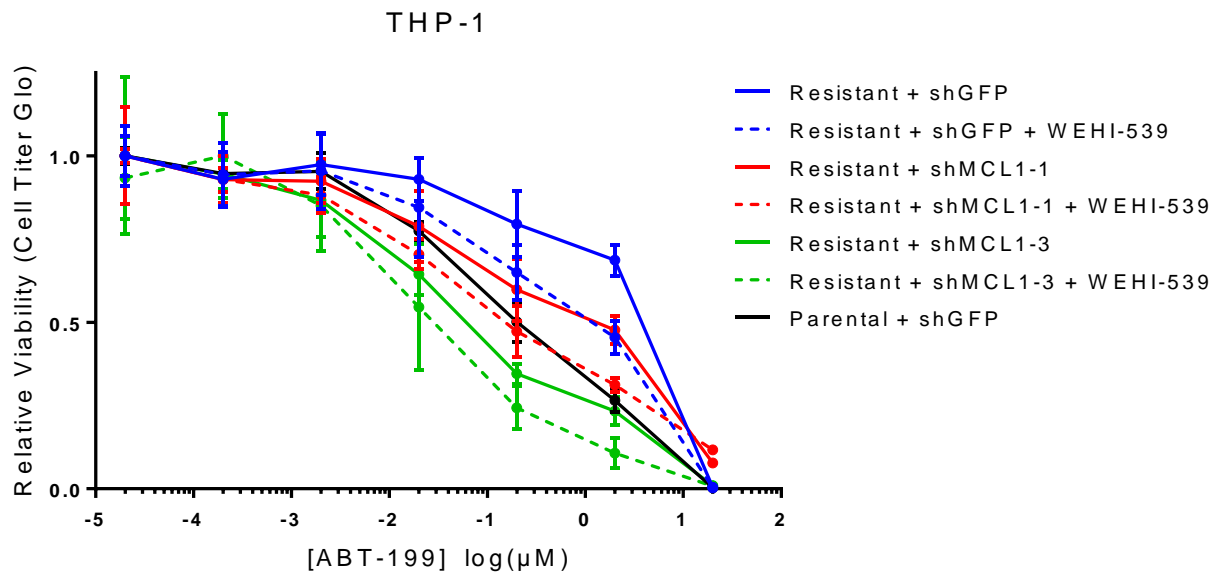

**Supplementary Figure 6. Resensitization of high resistance THP-1 to ABT-199.** ABT-199 dose-response curves for an ABT-199-resistant THP-1 line and subsequent resensitization of that line using the BCL- $X_L$  inhibitor WEHI-539 and/or either of two independent hairpins targeting MCL-1. Viability data is expressed as a percentage of DMSO-treated cells. SEM is of three independent experiments and indicated by error bars.

Figure S7

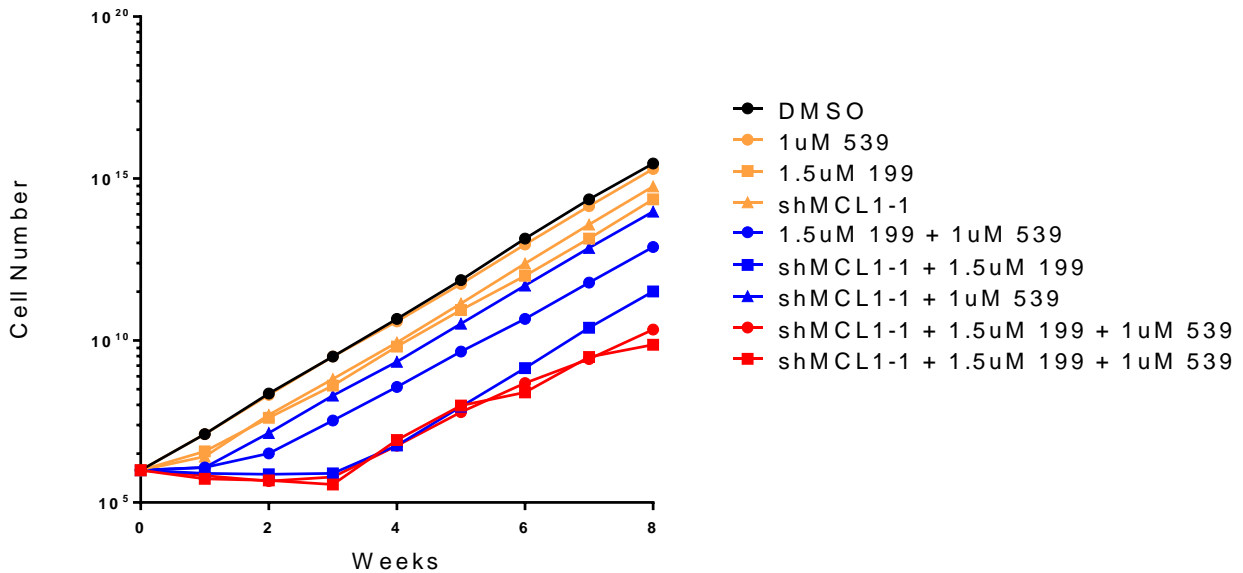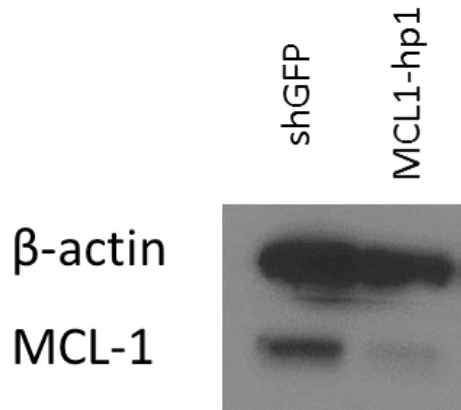

**Supplementary Figure 7. Time-to-resistance model for THP-1 cells with MCL-1 hairpin 1 (partial knockdown).** THP-1 cells were seeded at one million cells per dish, treated as indicated, and counted and replated weekly. Lines are color-coded by the number of anti-apoptotic proteins targeted: black (zero), yellow (one), blue (two), red (three). The final three-target combination was run in replicate. All other conditions were single experiments. The MCL-1 hairpin 1 used here provides incomplete knockdown. Corresponding immunoblot demonstrating hairpin knockdown in parental THP-1 is representative of three replicate experiments.



Figure S8

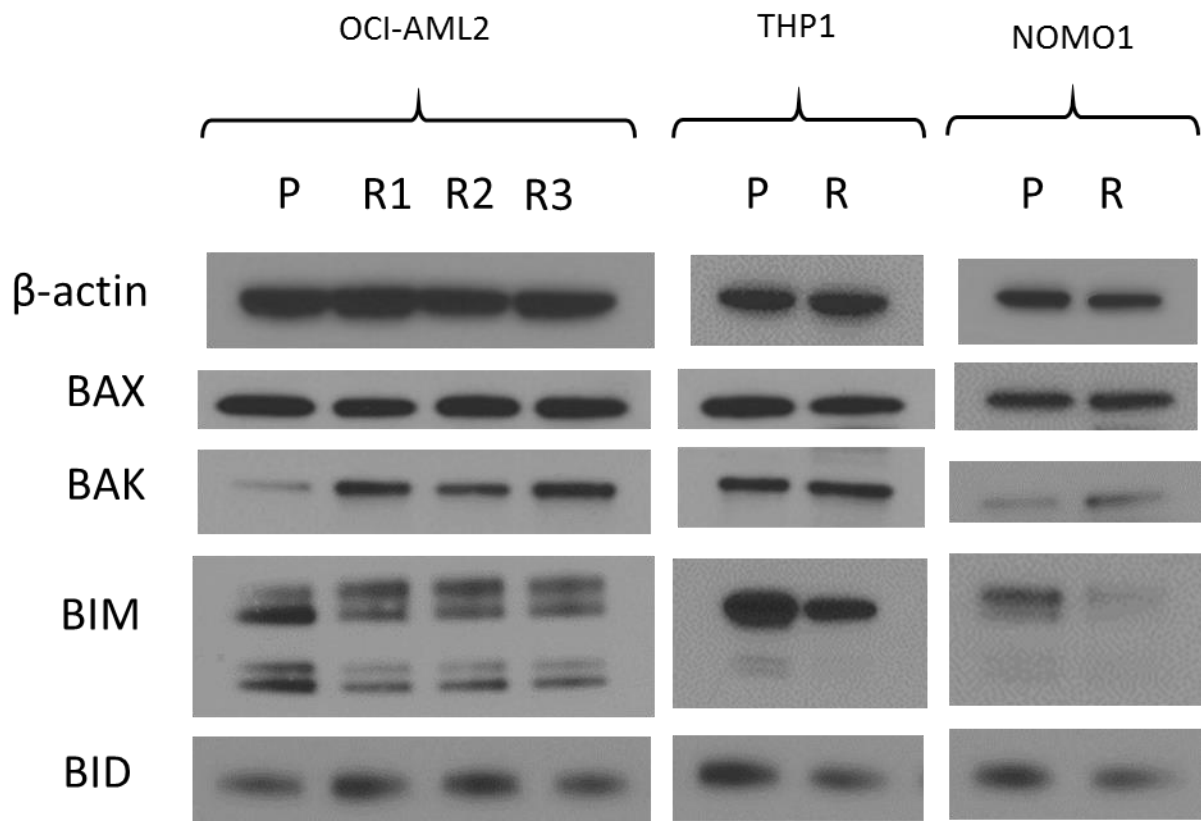

**Supplementary Figure 8. Western blot analysis of BCL-2 family proapoptotic sensitizers and effectors.** Western blot analysis of paired parental (P) and derived-resistant (R) cell lines immunoblotted as shown. Blots are representative of three replicate experiments.

Figure S9

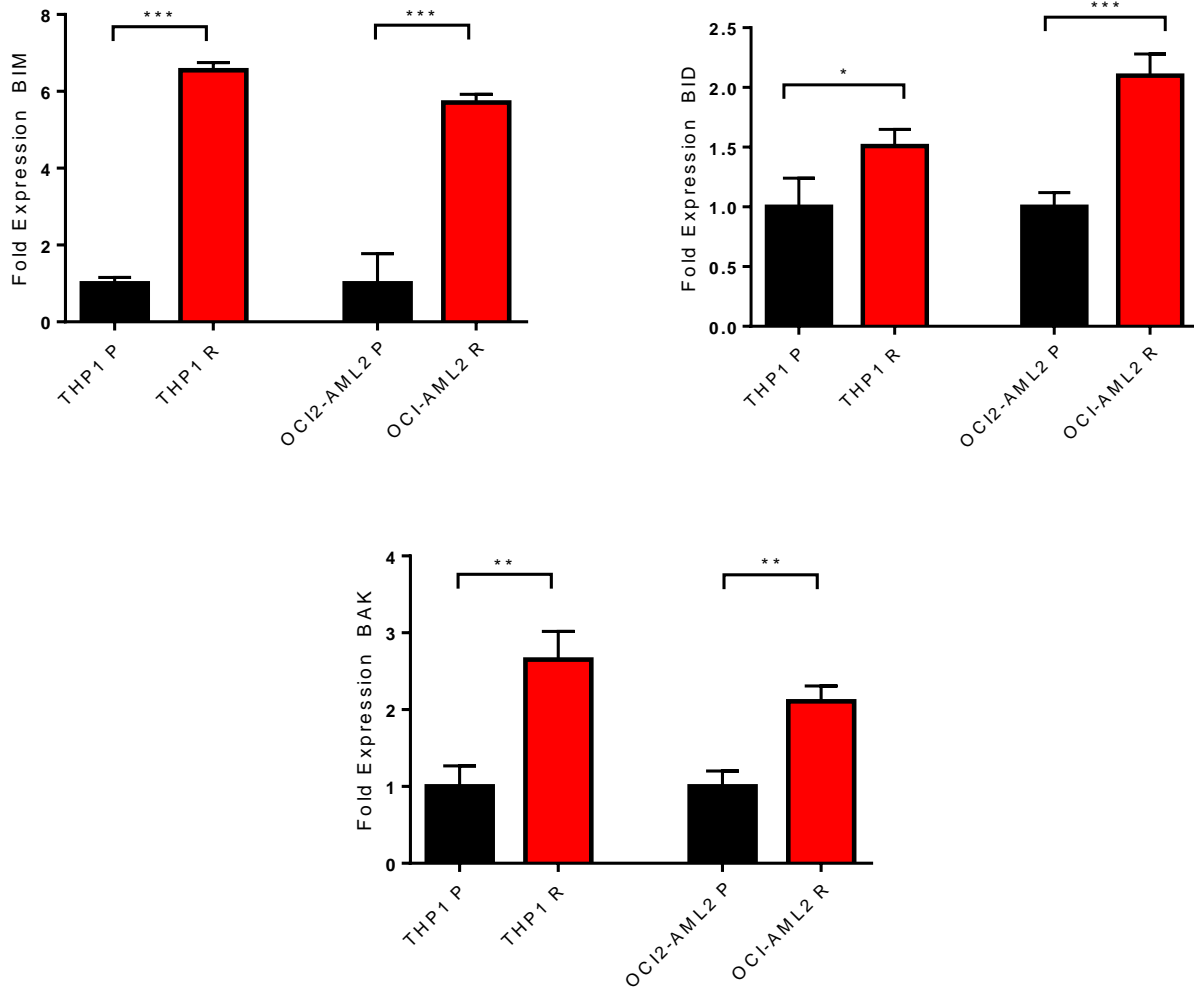

**Supplementary Figure 9. ABT-199-resistant cells transcriptionally upregulate the pro-apoptotic proteins BIM, BID, BAK.** qRT-PCR analysis of MCL-1 and BCL-X<sub>L</sub> in parental (black bars) versus resistant derivatives (red bars) of OCI-AML2 and THP1 cell lines. The resistant OCI-AML2 derivative used here corresponds to the “R2” derivative referenced elsewhere. The resistant THP1 derivative used here corresponds to the “High Resistance” derivative referenced elsewhere. Data are means  $\pm$  SD from three experiments. \*p < 0.05, \*\*\*p < 0.001, \*\*\*\*p < 0.0001 by Student’s t-test.

Figure S10

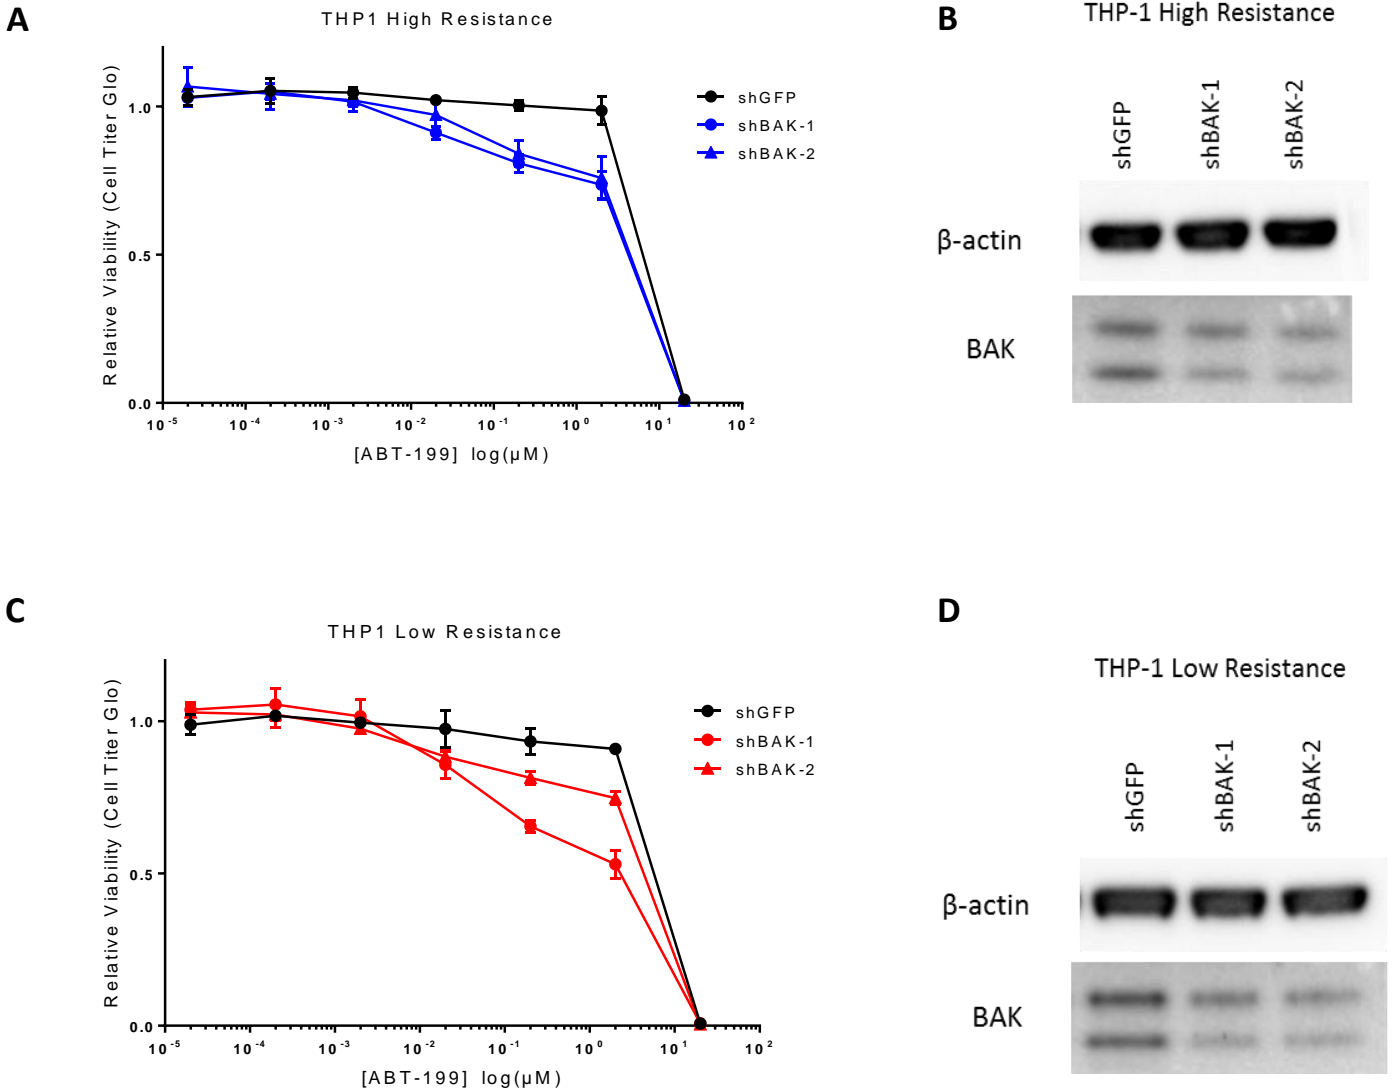

**Supplementary Figure 10. BAK knockout in ABT-199-resistant THP-1 cell lines partially reverses resistance to ABT-199. (A)(C)** ABT-199 dose-response curves for parental and differentially resistant derivatives of THP-1 transduced with short hairpins targeting either GFP or BAK. Viability data is expressed as a percentage of DMSO-treated cells. SEM is of three independent experiments and indicated by error bars. **(B)(D)** Western blot analysis of resistant THP-1 cells transduced with short hairpins targeting either shGFP or BAK. Blots are representative of two replicate experiments.

**Table S1: List of pathway-activating constructs and controls used in this study.**

| Pathway                              | Construct                                         | Official symbol and NM#                                                                               | Functionally validated? | Functional Validation Method     |
|--------------------------------------|---------------------------------------------------|-------------------------------------------------------------------------------------------------------|-------------------------|----------------------------------|
| Ras-MAPK                             | Kras (G12V)                                       | KRAS NM_004985.3 - human variant b                                                                    | Yes                     | Western (P-ERK)                  |
|                                      | Hras (G12V)                                       | HRAS NM_005343.2 - human variant 1                                                                    | Yes                     | Western (P-ERK)                  |
|                                      | MEK1 (S218D,S222D)                                | MAP2K1 NM_002755.3 - human                                                                            | Yes (both +/- V5)       | Western (P-ERK)                  |
| PI3K-AKT-mTOR                        | myr-FLAG-PIK3CA                                   | PIK3CA NM_174574.1 - bovine                                                                           | Yes                     | Western (P-AKT)                  |
|                                      | myr-FLAG-AKT1                                     | AKT1 NM_005163.2 - human variant 1                                                                    | Yes                     | Western (P-AKT, P-S6K1)          |
|                                      | FLAG-Rheb (Q64L)                                  | RHEB NM_005614.3 - human                                                                              | Yes                     | Western (P-S6K1)                 |
| NF-κB                                | IKKα (S176E,S180E)                                | CHUK NM_001278.3 - human                                                                              | Yes                     | Reporter (NF-κB_Luc)             |
|                                      | FLAG-IKKβ (S177E,S181E)                           | IKBKB NM_001556.2 - human variant 1                                                                   | Yes                     | Reporter (NF-κB_Luc)             |
| Jak/Stat                             | JAK2 (V617F)                                      | JAK2 NM_004972.3 - human                                                                              | Yes                     | Reporter (Stat_Luc)              |
|                                      | Stat3 (A662C,N664C,V667L)                         | STAT3 NM_139276.2 - human variant 1                                                                   | Yes                     | Reporter (Stat_Luc)              |
| Wnt/b-catenin                        | β-catenin (S33A, S37A, T41A, S45A)                | Ctnnb1 NM_001165902.1 - mouse variant 2                                                               | Yes (both +/- V5)       | Reporter (TCF-LEF_Luc)           |
|                                      | GSK3β (K85A)                                      | GSK3B NM_001146156.1 - human variant 2                                                                | Yes                     | Reporter (TCF-LEF_Luc)           |
|                                      | β-catenin (S33Y)                                  | CTNNB1 NM_001904.3 - human variant 1                                                                  | Yes (both +/- V5)       | Reporter (TCF-LEF_Luc)           |
| JNK                                  | JNK2 WT O/E (MAPK9)                               | MAPK9 NM_002752.4 - human variant JNK2-a2                                                             | No                      | Reporter (AP1_Luc)               |
|                                      |                                                   | Map2k7 NM_011944.3 linker MAPK9 NM_002752.4-mouse Mkk7 variant 2 plus human variant JNK2-a2           |                         |                                  |
| ERK5                                 | Mkk7-JNK2 fusion                                  |                                                                                                       | Yes                     | Reporter (AP1_Luc)               |
|                                      | MEK5 DD(S311D,T315D)                              | MAP2K5 NM_145160.2 - human variant 1                                                                  | No                      | Western (ERK5 laddering)         |
| Notch                                | myr-FLAG -MEK5                                    | MAP2K5 NM_145160.2 - human variant 1                                                                  | Yes                     | Western (ERK5 laddering)         |
|                                      | Notch1 intracellular domain                       | NOTCH1 NM_017617.3 - human, intracellular domain<br>see sequence                                      | Yes (both +/- V5)       | Reporter (HES1_Luc)              |
|                                      | Notch3 intracellular domain                       | NOTCH3 NM_000435.2 - human ,intracellular domain<br>see sequence                                      | Yes (both +/- V5)       | Reporter (HES1_Luc)              |
| p38                                  | p38 WT O/E (MAPK14)                               | MAPK14 NM_139012.2 - human variant 2                                                                  | Yes                     | Western (P-p38)                  |
|                                      | FLAG-MKK6 (S207E,T211E)                           | MAP2K6 NM_002758.3 - human                                                                            | Yes                     | Western (P-p38)                  |
| Hedgehog                             | Gli2 truncation                                   | GLI2 NM_005270.4 - human, truncation mutant see<br>sequence                                           | Yes                     | Reporter (Gli_Luc)               |
|                                      | SmoM2 (W535L)                                     | SMO NM_005631.4 - human                                                                               | Yes                     | Reporter (Gli_Luc)               |
| TGFβ                                 | TGFβR1                                            | TGFBR1 NM_004612.2 - human variant 1                                                                  | Yes                     | Immunofluorescence (P-Smad2/3)   |
| Mitochondrial apoptosis (intrinsic)  | BCL2                                              | BCL2 NM_000633.2 - human variant alpha                                                                | Yes                     | Western (cleaved caspase 9)      |
|                                      | BCL-XL                                            | BCL2L1 NM_138578.1 - human variant 1                                                                  | Yes                     | Western (cleaved caspase 9)      |
| Death receptor apoptosis (extrinsic) | Caspase-8 (C360A)                                 | CASP8 NM_033355.3 - human variant B                                                                   | Yes                     | Western (cleaved caspase 8)      |
| All apoptosis                        | Caspase-3 (C163A)                                 | CASP3 NM_032991.2 - human variant beta                                                                | Yes                     | Western (cleaved caspase 3/7)    |
| Estrogen receptor                    | ERα (Y537S mutant)                                | ESR1 NM_000125.3 - human variant 1<br>AR NM_000044.3 - human variant 1,splice isoform<br>see sequence | Yes                     | Reporter (ERE_Luc)               |
| Androgen receptor                    | AR-V7                                             |                                                                                                       | Yes (both +/- V5)       | Western (ARE_Luc)                |
| Hippo                                | FLAG-YAP2 (5SA)                                   | YAP1 NM_001195044.1 - human variant 3                                                                 | Yes                     | Immunofluorescence (nuclear YAP) |
|                                      | Lats2 kinase dead (K697R)                         | LATS2 NM_014572.2 - human                                                                             | Yes (both +/- V5)       | Immunofluorescence (nuclear YAP) |
| p53                                  | p53 (dominant negative R175H mutant)              | TP53 NM_001126114.2 - human variant 3                                                                 | Yes                     | Reporter (p53_Luc)               |
| Ral                                  | HRas (G12V, E37G)                                 | HRAS NM_001130442.1 - human variant 3                                                                 | Not tested              |                                  |
|                                      | Rgl2-CAAX                                         | Rgl2 NM_009059.2 - mouse plus C-term KRAS                                                             | Not tested              |                                  |
|                                      | RalA (G23V) (two forms - full and mature peptide) | RALA NM_005402.3 - human                                                                              | Not tested              |                                  |
| CONTROLS                             | HcRed                                             | N/A                                                                                                   | N/A                     |                                  |
|                                      | Luciferase                                        | N/A                                                                                                   | N/A                     |                                  |
|                                      | MEK1                                              | MAP2K1 NM_002755.3 - human                                                                            | N/A                     |                                  |

MAPK, mitogen-activated protein kinase; ERK, extracellular-signal-regulated kinase; PI3K, phosphoinositide 3-kinase; AKT, protein kinase B; mTOR, mammalian target of rapamycin; Rheb, ras homolog enriched in brain; NF-κB, nuclear factor kappa-light-chain-enhancer of activated B cells; IKKα, inhibitor of nuclear factor kappa-B kinase subunit alpha; IKKβ, inhibitor of nuclear factor kappa-B kinase subunit beta; GSK3β, glycogen synthase kinase 3 beta; TCF-LEF, transcription factor-lymphoid enhancer-binding factor; JNK, jun N-terminal kinase; MEK, mitogen-activated protein kinase kinase; HES1, hairy and enhancer of split-1; MKK6, mitogen-activated protein kinase kinase 6; Smo, smoothened; Gli, glioma-associated oncogene; TGFβ, transforming growth factor beta; Smad, mothers against DPP homolog; BCL, B-cell lymphoma; ERα, estrogen receptor alpha; ERE, estrogen response element; AR, androgen receptor; ARE, androgen response element; YAP, yes-associated protein; LATS, large tumor suppressor kinase; Ral, RAS-like protein; Rgl2, ral guanine nucleotide dissociation stimulator-like 2
